# Supplementary material
Source: PubMed Central journal article supplement (PMC3496186)
Supplement: NIHMS415205-supplement-02.pdf [file NIHMS415205-supplement-02.pdf]

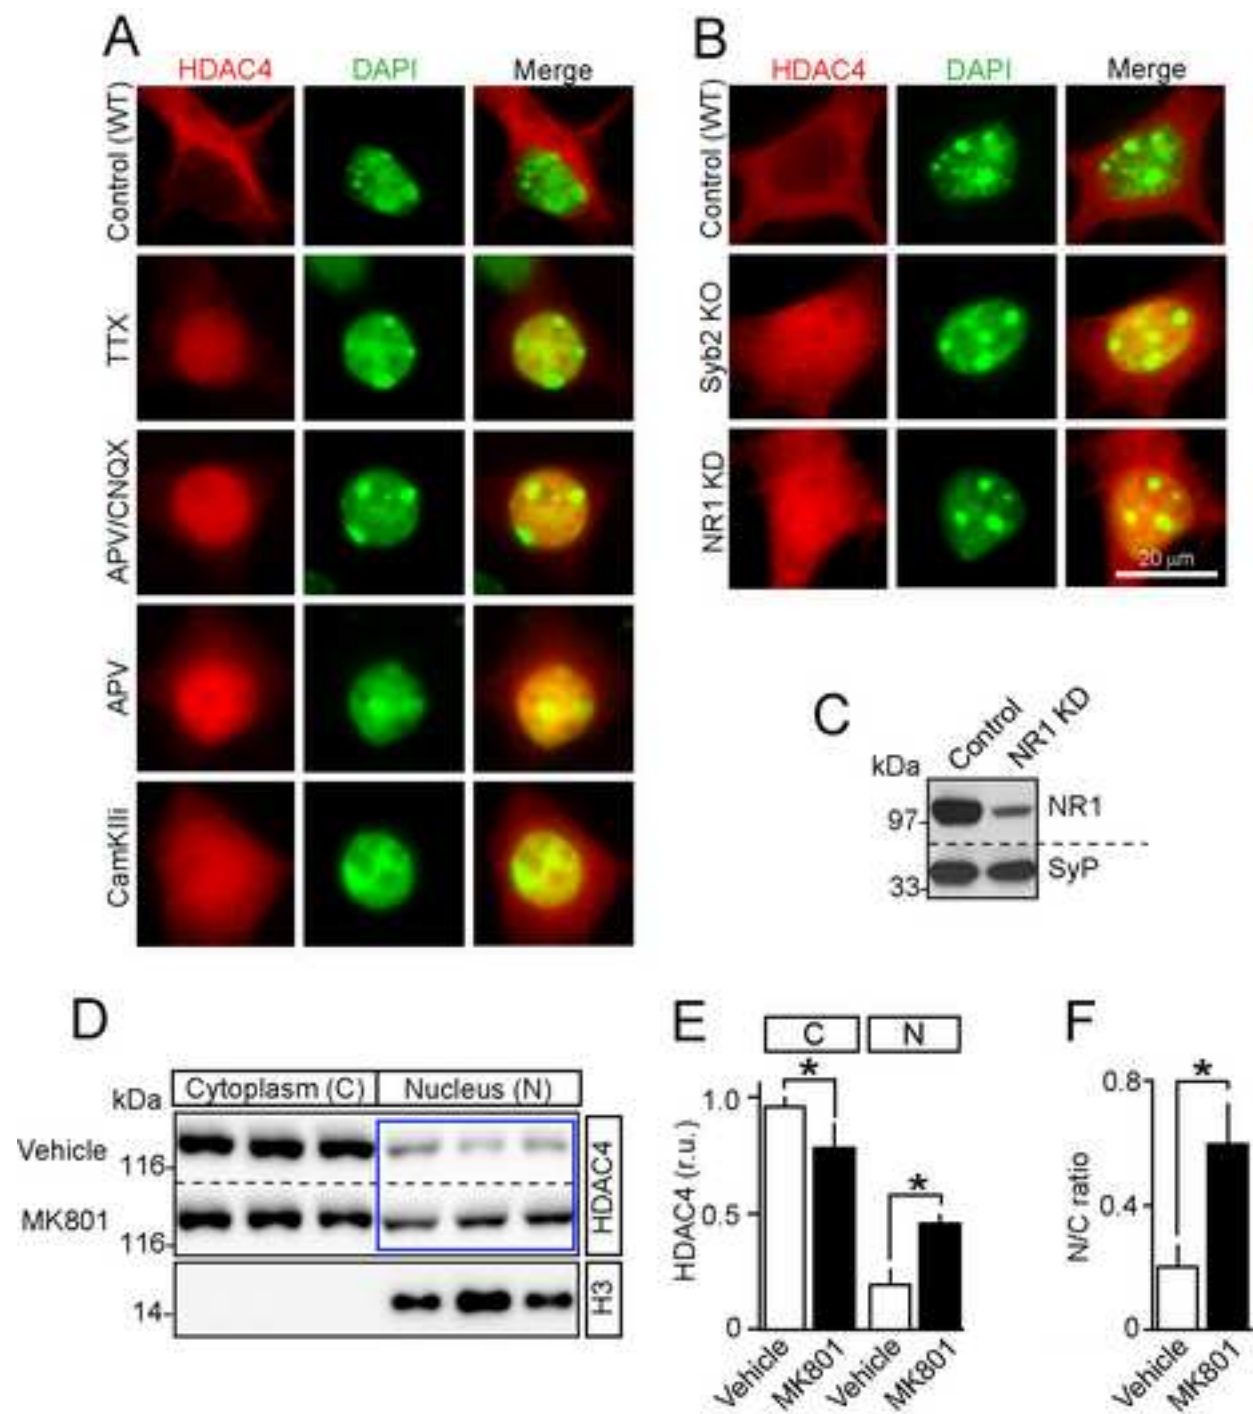

Fig.S1 Sando et al

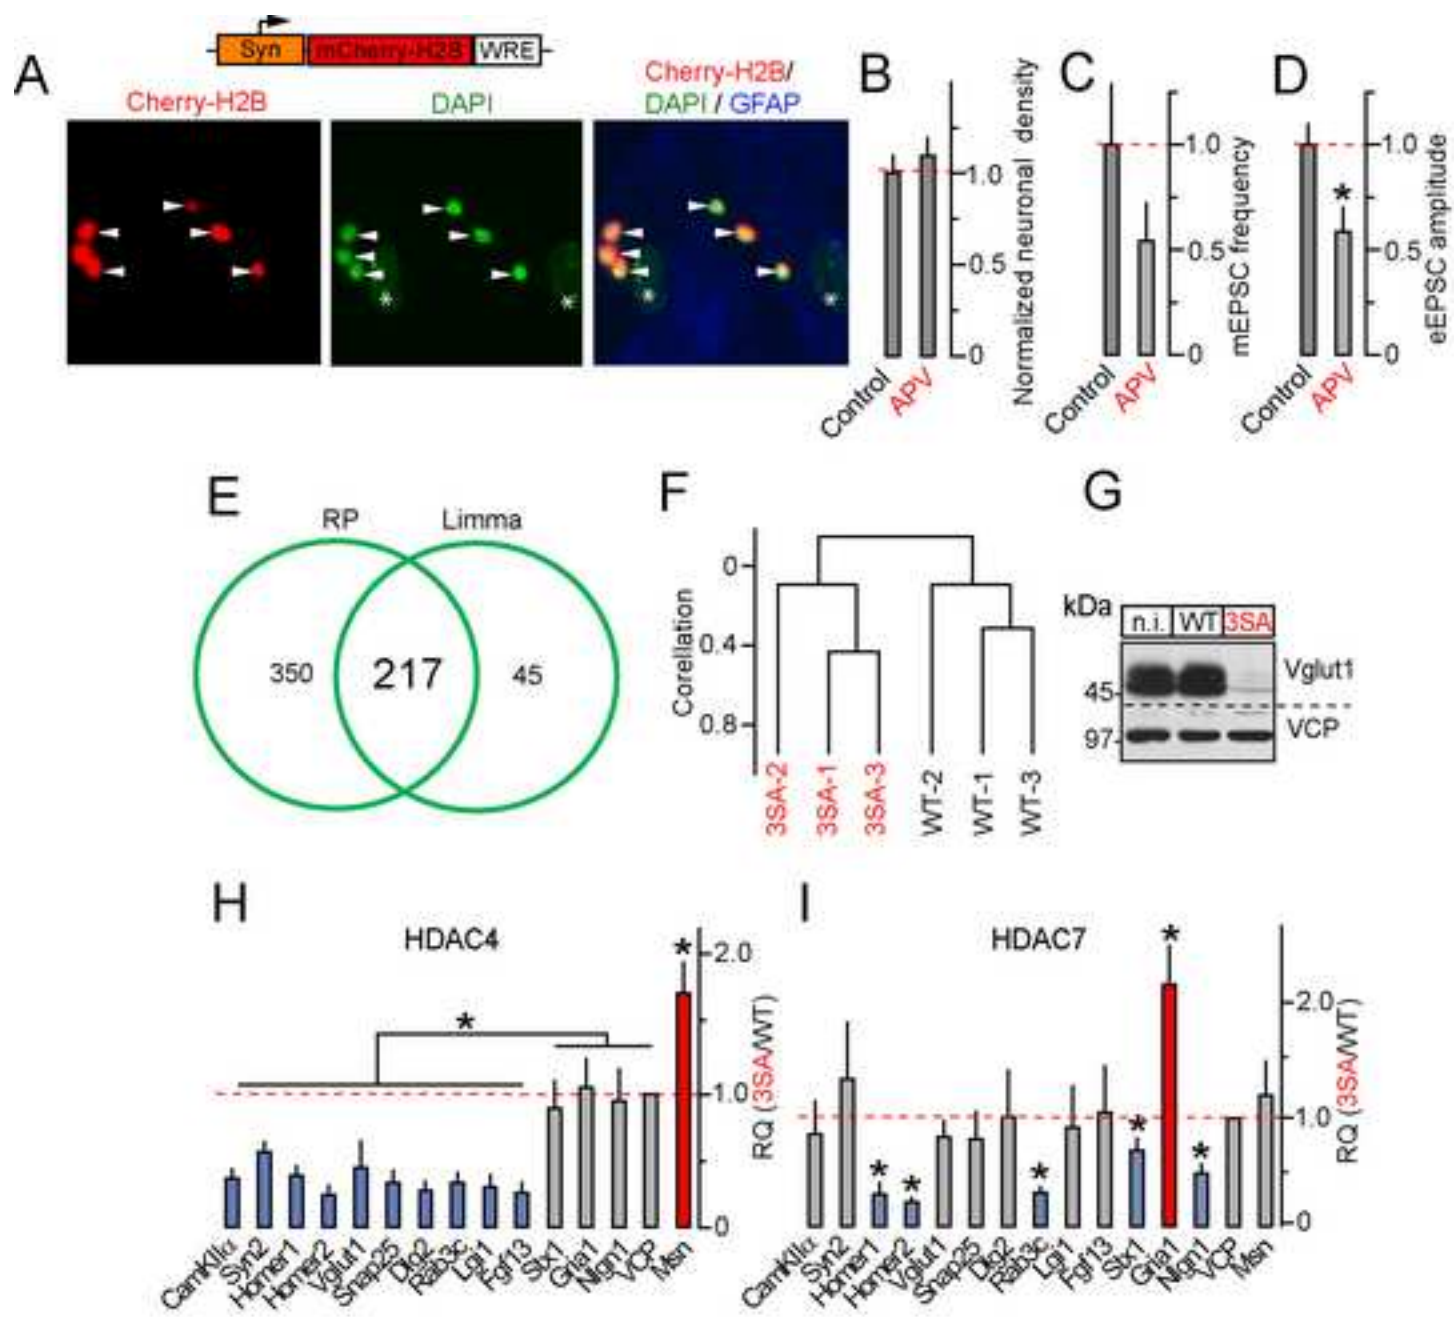

Fig.S2 Sando et al

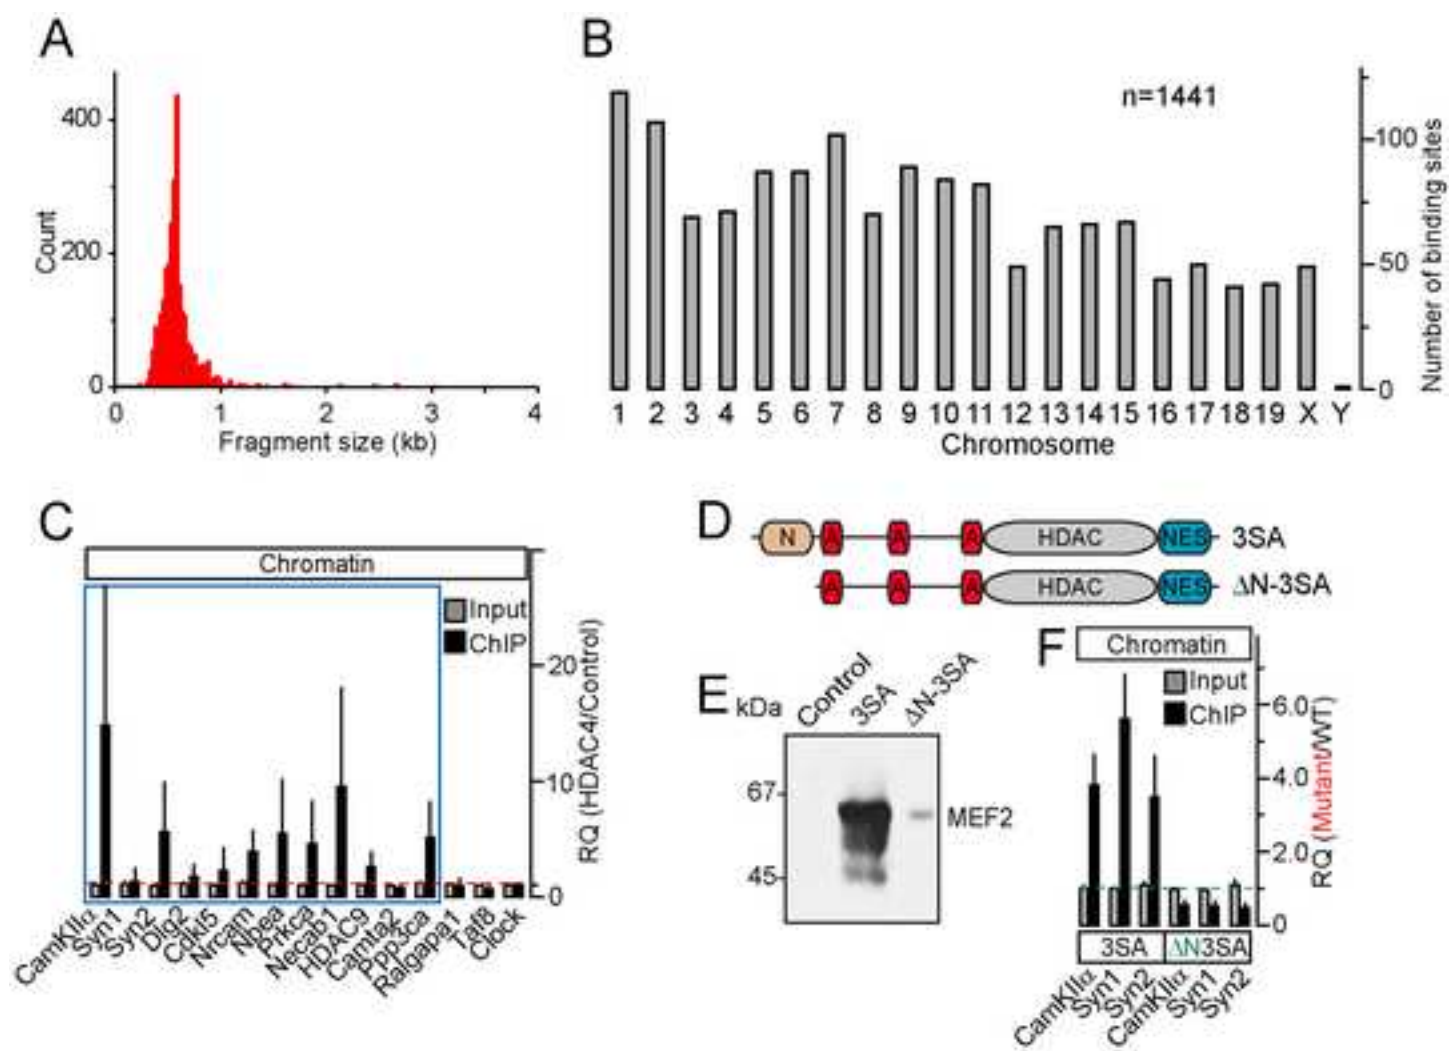

Fig.S3 Sando et al

A

WT LLYGTNPLNRQKLDKLLGSLASV FVRLPCGGVGVDSDTIWNEVHSAGAARLAVGCVVE  
 +C LLYGTNPLNRQKLDKLLGSLASV FVRLPCGGVGVDSDTIWNEVHSAGAARLAVGCVVE  
 \*\*\*\*\*

**P800**

WT LVFKVATGELKNGFAVVRPPGHHAEESTPMGFICYFNSVAVAAKLLQQRLSVSKILIVDWD  
 LVFKVATGELKNGFAVVRPPWTPCGGEHAHGLLLLQLRGRGSQASAAEVEREQDPHRGLG  
 \*\*\*\*\*

WT VHHGNGTQQAFYS DPSVLYMSLHRYDDGNFFPGSGAPDEVGTGPGVGFNVNMAFTGGLDP  
 +C RAPWK RDPAGFLQRPQRPVHVPPPLRRWELLPRQGS#

WT PMGDAEYLAAFR TVVMPIASEFAPDVVLVSSGFDAVEGHPTPLGGYNLSARCFGYLT'KQL  
**H976**

WT MGLAGGRIVLA LEGGHDLTAICDASEAC ...

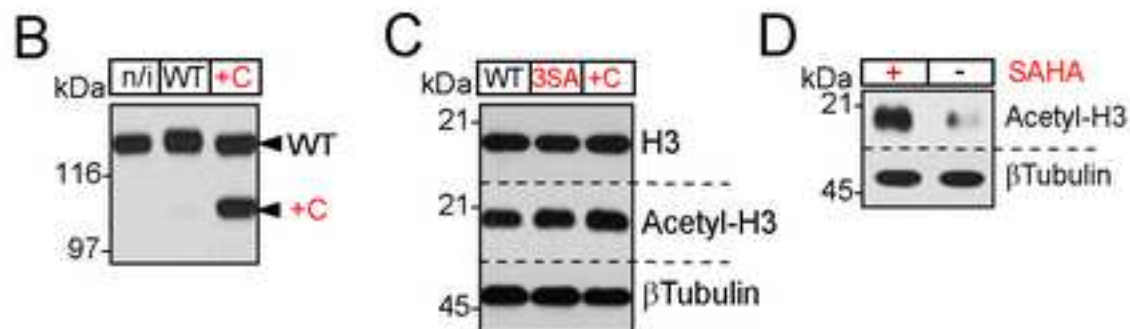

Fig.S4 Sando et al

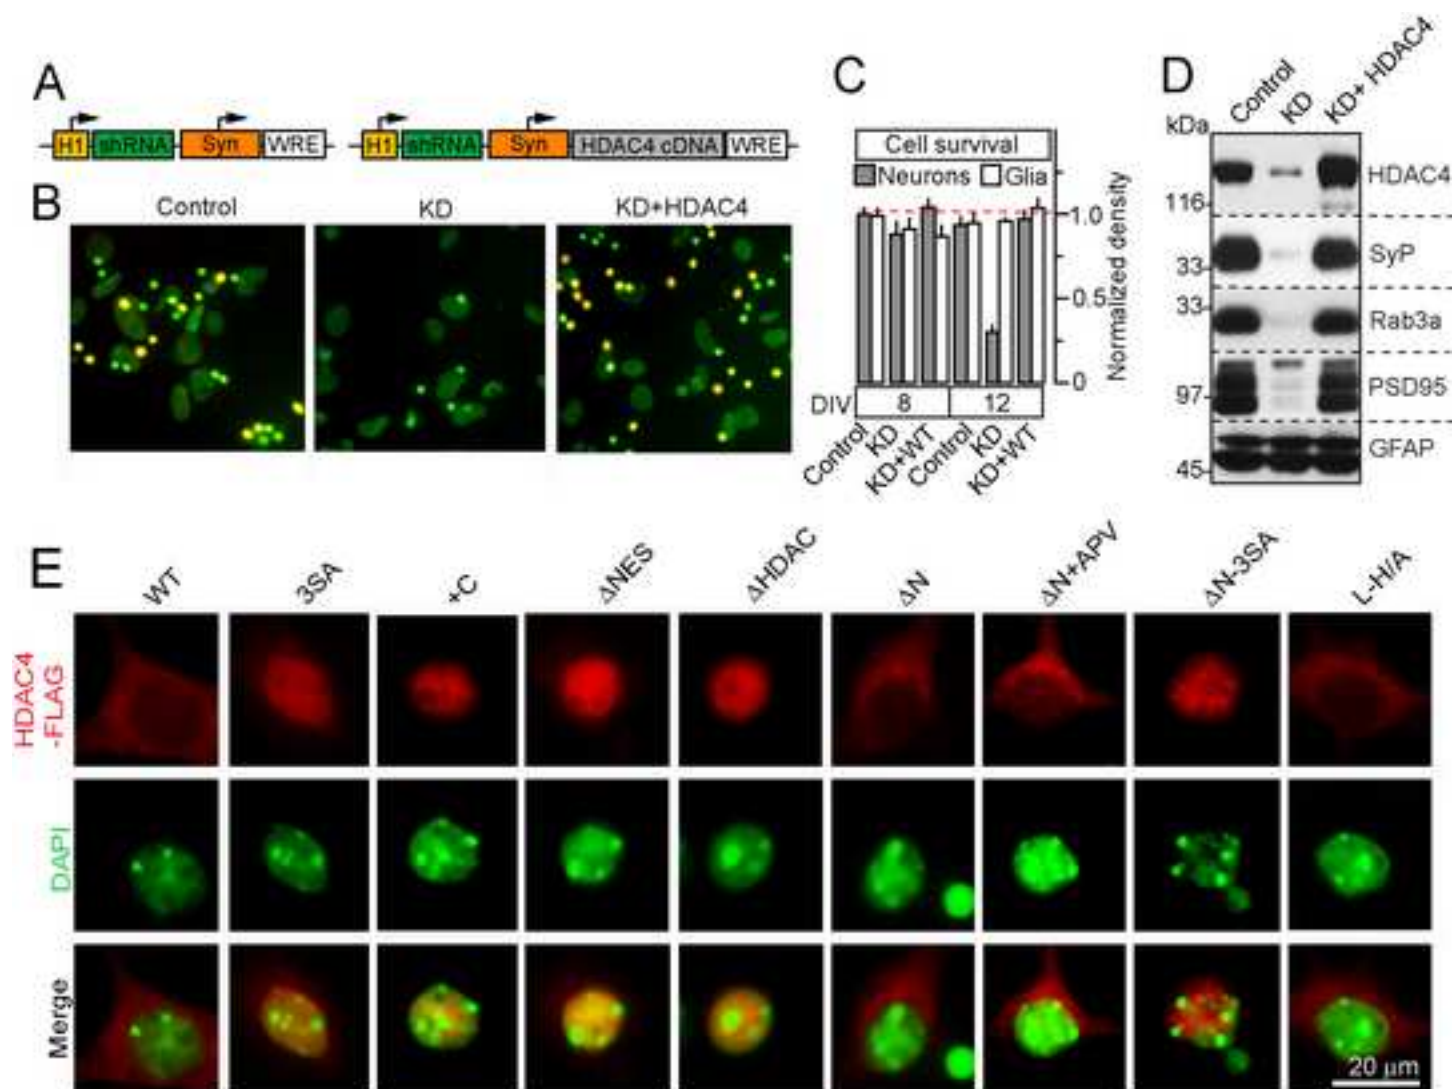

Fig.S5 Sando et al



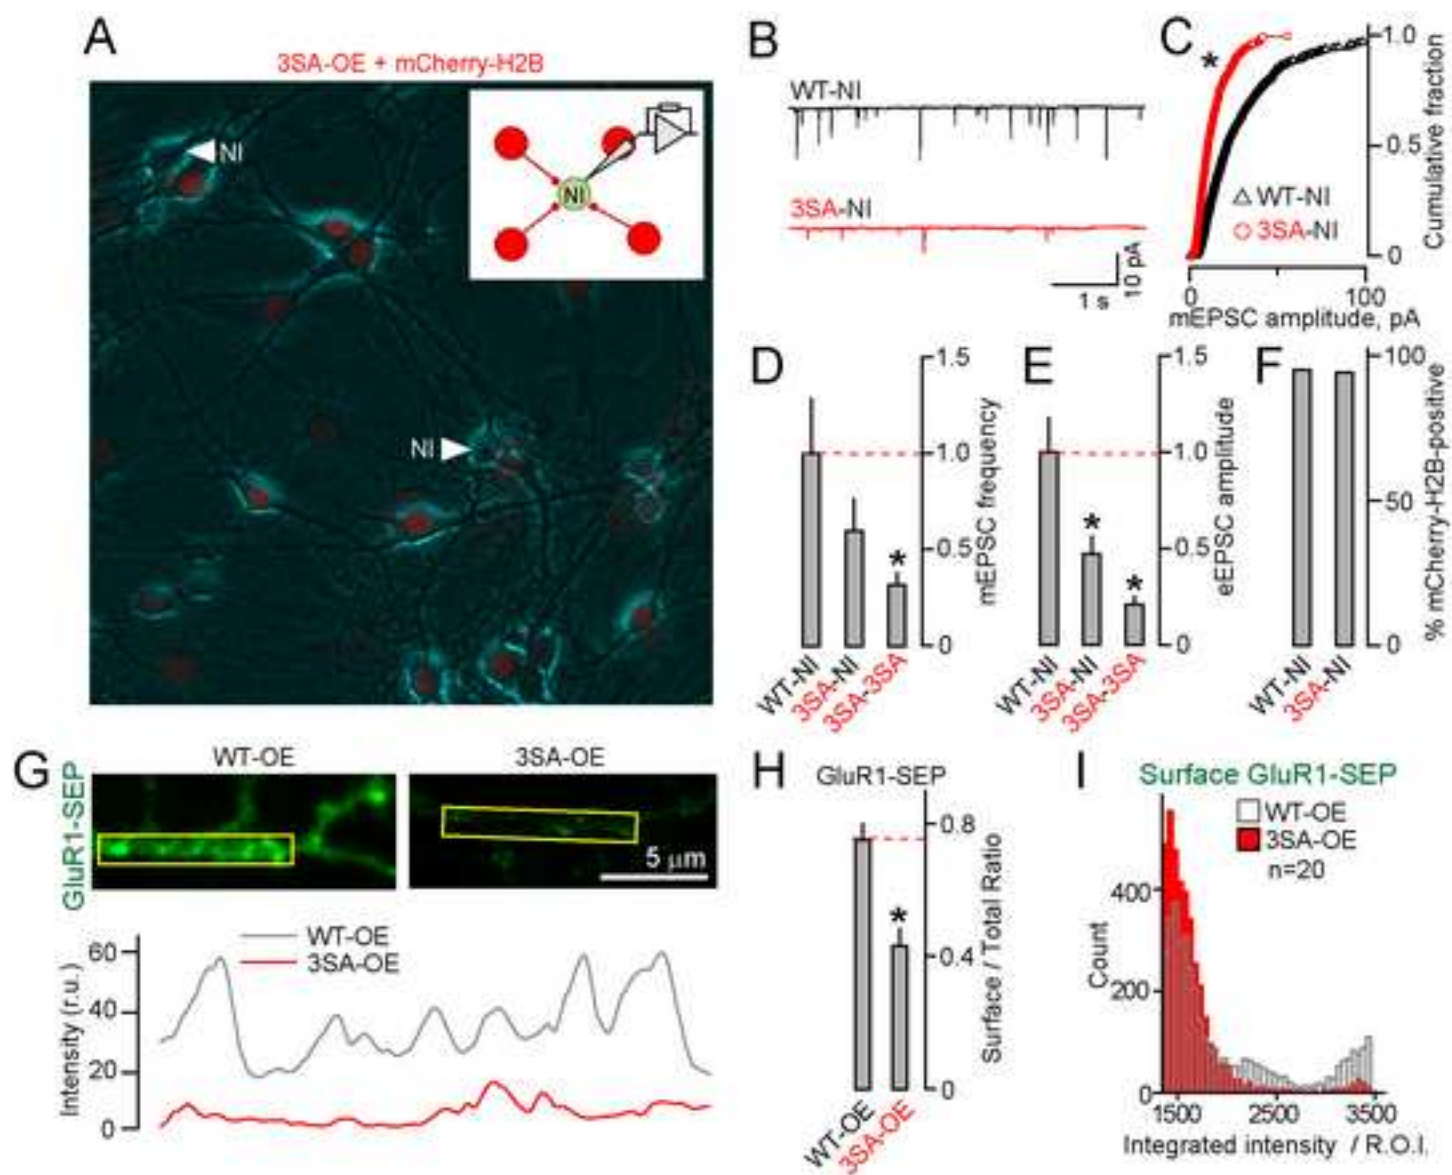

Fig.S6 Sando et al

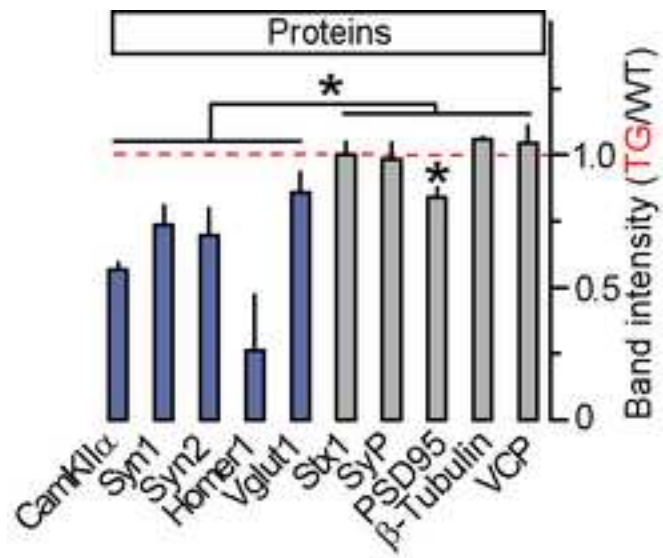

Fig.S7 Sando et al
